# Crystal Structure of *Lymnaea stagnalis* AChBP Complexed with the Potent nAChR Antagonist DH $\beta$ E Suggests a Unique Mode of Antagonism

Azadeh Shahsavari<sup>1</sup>, Jette S. Kastrup<sup>1</sup>, Elsebet Ø. Nielsen<sup>2</sup>, Jesper L. Kristensen<sup>1</sup>, Michael Gajhede<sup>1</sup>, Thomas Balle<sup>1\*</sup><sup>‡</sup>

**1** Department of Drug Design and Pharmacology, Faculty of Health and Medical Sciences, University of Copenhagen, Copenhagen, Denmark, **2** NeuroSearch A/S, Ballerup, Denmark

## Abstract

Nicotinic acetylcholine receptors (nAChRs) are pentameric ligand-gated ion channels that belong to the Cys-loop receptor superfamily. These receptors are allosteric proteins that exist in different conformational states, including resting (closed), activated (open), and desensitized (closed) states. The acetylcholine binding protein (AChBP) is a structural homologue of the extracellular ligand-binding domain of nAChRs. In previous studies, the degree of the C-loop radial extension of AChBP has been assigned to different conformational states of nAChRs. It has been suggested that a closed C-loop is preferred for the active conformation of nAChRs in complex with agonists whereas an open C-loop reflects an antagonist-bound (closed) state. In this work, we have determined the crystal structure of AChBP from the water snail *Lymnaea stagnalis* (*Ls*) in complex with dihydro- $\beta$ -erythroidine (DH $\beta$ E), which is a potent competitive antagonist of nAChRs. The structure reveals that binding of DH $\beta$ E to AChBP imposes closure of the C-loop as agonists, but also a shift perpendicular to previously observed C-loop movements. These observations suggest that DH $\beta$ E may antagonize the receptor via a different mechanism compared to prototypical antagonists and toxins.

**Citation:** Shahsavari A, Kastrup JS, Nielsen EØ, Kristensen JL, Gajhede M, et al. (2012) Crystal Structure of *Lymnaea stagnalis* AChBP Complexed with the Potent nAChR Antagonist DH $\beta$ E Suggests a Unique Mode of Antagonism. PLoS ONE 7(8): e40757. doi:10.1371/journal.pone.0040757

**Editor:** Zhe Zhang, Virginia Commonwealth University, United States of America

**Received:** April 7, 2012; **Accepted:** June 12, 2012; **Published:** August 22, 2012

**Copyright:** © 2012 Shahsavari et al. This is an open-access article distributed under the terms of the Creative Commons Attribution License, which permits unrestricted use, distribution, and reproduction in any medium, provided the original author and source are credited.

**Funding:** This work was supported by Danscatt, The Novo Nordisk Foundation, and The Danish Research Agency for Science Technology and Innovation. The funders had no role in study design, data collection and analysis, decision to publish, or preparation of the manuscript.

**Competing Interests:** EØN is employed by the company NeuroSearch A/S. This does not alter the authors' adherence to all the PLoS ONE policies on sharing data and materials.

\* E-mail: thomas.balle@sydney.edu.au

<sup>‡</sup> Current address: Faculty of Pharmacy, The University of Sydney, Sydney, NSW, Australia

## Introduction

Neuronal nicotinic acetylcholine receptors (nAChRs) are pentameric ligand-gated ion channels present both in the central and peripheral nervous system. nAChRs belong to the Cys-loop superfamily and exist as homo or heteromeric receptors composed of either  $\alpha$  subunits or  $\alpha$  and  $\beta$  subunits in combination. The subunits are arranged symmetrically around a central ion channel pore. Each monomer possesses an N-terminal extracellular ligand-binding domain, a transmembrane region that forms the ion channel pore, and an extended intracellular loop [1–3]. These receptors are allosteric proteins that exist in a minimum of three different conformational states, termed the resting (closed), activated (open) and desensitized (closed) states. The balance between these states regulates the permeability of cations through the ion channel [4].

Insight into ligand binding and nAChR activation is rapidly emerging and structures of the acetylcholine binding protein (AChBP) have significantly aided this process. The mulloskan AChBP is a structural and functional homologue of the extracellular domain of nAChRs [5,6]. Previous studies have suggested that a closed C-loop is associated with agonist-bound structures of AChBP, and thus represents an active conformation

of nAChRs, whereas an open conformation of the C-loop observed in antagonist-bound structures represents an inactive form of the receptor [7–10]. Likewise, a correlation between the degree of agonism and closure of the C-loop has been suggested [8,11]. In contrast to this, it was reported in a recent study that a series of agonists with 21–76% efficacy at  $\alpha 4\beta 2$  nAChRs displayed no variation in the degree of C-loop closure in *Lymnaea stagnalis* (*Ls*) AChBP [12].

The erythrina alkaloid dihydro- $\beta$ -erythroidine (DH $\beta$ E) (Fig. 1a) is a potent competitive antagonist at nAChRs that has been used extensively as a pharmacological tool compound to gain a better understanding of the involvement of these receptors in physiological processes. DH $\beta$ E is a somewhat selective antagonist with preference for  $\alpha 4$  containing receptors [13–16]. It inhibits  $\alpha 4\beta 2$  receptors with nanomolar affinity ( $K_i = 98$  nM) [17] whereas affinities at  $\alpha 7$  and  $\alpha 3\beta 4$  nAChRs lie in the micromolar range ( $K_i = 11$  and  $32$   $\mu$ M, respectively) [17,18].

To gain further insight into the inhibitory mechanism and binding mode of DH $\beta$ E, we have determined the crystal structure of *Ls*-AChBP bound to DH $\beta$ E. The structure reveals features that are unique to this antagonist.

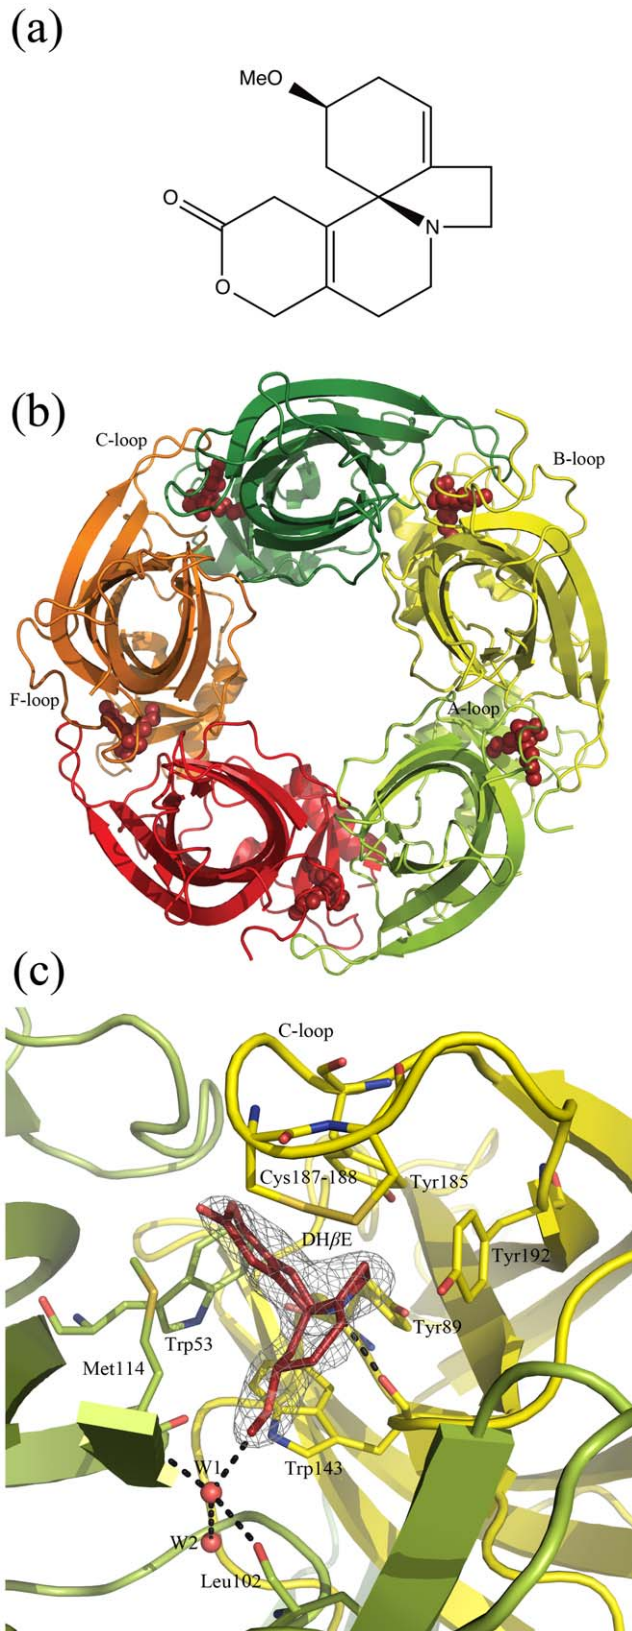

**Figure 1. The structure of DH $\beta$ E and *Ls*-AChBP complexed with DH $\beta$ E.** (a) Structure of DH $\beta$ E. (b) Cartoon diagram showing homopentameric *Ls*-AChBP viewed along the five-fold symmetry axis. The five subunits are shown in different colors and DH $\beta$ E in red spheres representation. (c) Ligand-binding pocket at the interface of two

monomers formed by the highly conserved aromatic residues Tyr89, Trp143, Tyr185, and Tyr192 from the principal side of the interface (yellow) and Trp53 from the complementary side (limon). DH $\beta$ E is shown in red and an omit 2Fo-Fc map is shown at  $1\sigma$ . Hydrogen bonds between DH $\beta$ E and its surroundings are shown as stippled lines. A blow-up of DH $\beta$ E and the omit 2Fo-Fc map shown at  $1\sigma$  is provided in Fig. S2.

doi:10.1371/journal.pone.0040757.g001

## Results and Discussion

### DH $\beta$ E binds at *Ls*-AChBP with an affinity comparable to that at $\alpha 4\beta 2$ nAChRs

The binding affinity ( $K_i$ ) of DH $\beta$ E at *Ls*-AChBP was determined to  $52 \pm 5$  nM by replacement of [ $^3$ H]-epibatidine binding using a recently reported assay where *Ls*-AChBP for reasons of compatibility with other medium throughput assays was fused to a 5-HT $3$ A ion channel [12]. The affinity of DH $\beta$ E at *Ls*-AChBP closely resembles that of  $\alpha 4\beta 2$  nAChRs, supporting previous observations that *Ls*-AChBP can be used as a structural surrogate for  $\alpha 4\beta 2$  receptors [12] to study how DH $\beta$ E interacts with the receptor.

### The structure of *Ls*-AChBP complexed with DH $\beta$ E

The structure of *Ls*-AChBP was determined at 2.5 Å resolution (Table 1). The crystal belongs to space group  $P2_12_12_1$  with a DH $\beta$ E molecule bound at the interface of all ten monomers in the asymmetric unit of the crystal. The DH $\beta$ E-bound structure reported here shows the same homopentameric assembly as previously determined AChBP structures (Fig. 1b) [7–12]. Each monomer consists of an *N*-terminal  $\alpha$ -helix, two short  $\alpha 3_{10}$  helices and a 10-stranded  $\beta$ -sandwich core. The F-loop portion of the molecule (residues 154–160 in subunits B and E and 155–160 in subunits C, G, H, I, and J) is not completely modeled due to lack of clear electron density, signifying a greater flexibility of these parts of the protein.

The electron density map clearly demonstrate the existence of a single binding orientation for each of the ten DH $\beta$ E molecules (Fig. 1c). DH $\beta$ E binds underneath a closed C-loop at a position corresponding to that of nicotine in the *Ls*-AChBP crystal structure (PDB ID: 1uw6 [19]), Figs. 2a,b. The binding pocket is formed by the highly conserved aromatic residues Tyr89, Trp143, Tyr185, and Tyr192 from the principal side of the interface and Trp53 from the complementary side (Figs. 1c and 2a). This orientation is in agreement with a previous study where substitution of  $\beta 2$ Trp82,  $\alpha 4$ Tyr126,  $\alpha 4$ Trp182,  $\alpha 4$ Tyr223, and  $\alpha 4$ Tyr230 in the  $\alpha 4\beta 2$  nAChR (corresponding to Trp53, Tyr89, Trp143, Tyr192, and Tyr195 in AChBP) for alanine were shown to decrease sensitivity to inhibition by DH $\beta$ E [17].

Superposition of the nicotine-bound *Ls*-AChBP structure onto the DH $\beta$ E-bound structure ( $C^\alpha$  atoms) gives a low RMSD value of 0.14 Å, indicating high structural similarity between the two structures. The main structural difference is the orientation of the C-loop (residues 185–192) (Fig. 2) capping the binding site. Also, the orientation of Met114 on the complementary side of the ligand-binding site differs between the two structures.

### DH $\beta$ E shows a similar hydrogen-bonding network to agonists

The protonated tertiary nitrogen of DH $\beta$ E lies within hydrogen-bonding distance of the backbone carbonyl of Trp143 (2.7 Å, chain D) and is also in close contact with the hydroxyl group of Tyr89 from the B-loop (3.5 Å, chain D) (Fig. 2a). Hydrogen bonds to these two residues on the principal side of the subunit interface have been observed for other agonists bound to AChBP [12,19].

**Table 1.** Data collection and refinement statistics of the DH $\beta$ E-bound Ls-AChBP structure.

| Space group                                                | P2 <sub>1</sub> 2 <sub>1</sub> 2 <sub>1</sub> |
|------------------------------------------------------------|-----------------------------------------------|
| Unit cell:                                                 |                                               |
| <i>a</i> , Å                                               | 119.25                                        |
| <i>b</i> , Å                                               | 121.31                                        |
| <i>c</i> , Å                                               | 152.07                                        |
| $\alpha = \beta = \gamma$ , °                              | 90.00                                         |
| Resolution range, Å                                        | 19.61–2.51 (2.64–2.51) <sup>a</sup>           |
| Completeness, %                                            | 98.5 (92.7)                                   |
| Overall number of reflections                              | 304,953                                       |
| Number of unique reflections                               | 74,987                                        |
| Redundancy                                                 | 4.1 (4.0)                                     |
| R <sub>merge</sub> , %                                     | 7.4 (41.0)                                    |
| <i>I</i> / $\sigma$ <i>I</i>                               | 15.9 (2.0)                                    |
| Solvent, %                                                 | 43.7                                          |
| Number of atoms                                            | 17,183                                        |
| Number of DH $\beta$ E molecules                           | 10                                            |
| Number of DH $\beta$ E atoms                               | 20                                            |
| Number of water molecules                                  | 687                                           |
| R <sub>work</sub> , %                                      | 20.0                                          |
| R <sub>free</sub> , %                                      | 25.0                                          |
| Ramachandran plot, residues in most favored regions, %     | 91.7                                          |
| Rmsd of bonds lengths, Å                                   | 0.013                                         |
| Rmsd of bonds angles, °                                    | 1.4                                           |
| Average B-factor of protein main chains, Å <sup>2</sup>    | 35                                            |
| Average B-factor of protein side chains, Å <sup>2</sup>    | 39                                            |
| Average B-factor of water molecules, Å <sup>2</sup>        | 36                                            |
| Average B-factor of DH $\beta$ E molecules, Å <sup>2</sup> | 30                                            |
| Wilson B-factor, Å <sup>2</sup>                            | 45                                            |

<sup>a</sup>Numbers in parentheses represent the last resolution shell values.  
doi:10.1371/journal.pone.0040757.t001

On the complementary side, DH $\beta$ E interacts with the protein main chain *via* a water-mediated hydrogen bond (Fig. 2a). The oxygen of the methoxy group of DH $\beta$ E accepts a hydrogen bond from a water molecule, which is tightly coordinated to the backbone carbonyl oxygen of Leu102 and nitrogen of Met114. Similar water-mediated contacts have been previously reported in agonist-bound structures (Fig. 2b) [7–9,12,19,20]. In this way, the antagonist DH $\beta$ E bridges the principal and complementary side of the interface in a way comparable to that of agonists.

### DH $\beta$ E binds to Ls-AChBP under a shifted C-loop conformation

The conformation of the C-loop is very similar in all ten subunits (Fig. S1). In a previous study, the distance between the carbonyl oxygen atom of the conserved Trp residue in the A-loop (Trp143 in Ls-AChBP) and the  $\gamma$ -sulfur atom of the first Cys residue involved in disulfide bridge formation in the C-loop (Cys187 in Ls-AChBP) was used to quantify C-loop closure. This measurement was then correlated to the pharmacological profile of compounds co-crystallized with AChBP, suggesting a preference for antagonists to bind under open (extended) C-loops and agonists under closed (contracted) C-loops while partial agonists would

bind under loops with intermediate closure [21]. Applying this metric to our DH $\beta$ E-bound structure would classify the ligand as an agonist (Table 2), suggesting that it is insufficient to assess pharmacological fingerprints based on AChBP C-loop closure alone.

Comparison of DH $\beta$ E-bound Ls-AChBP with previously determined structures of Ls-AChBP in complex with small molecule agonists shows a new conformational state of the C-loop, which is not reflected by the distance measurement discussed above. This conformational state has not been observed in previously reported AChBP structures, where a closed C-loop corresponds to an agonist-bound state and an open C-loop to an antagonist-bound state. The C-loop conformational change has been quantified by measuring the angle between the projection of a vector defined from the center of the C-loop to the C<sup>z</sup> atom of Cys187 in the DH $\beta$ E-bound structure, and the corresponding projection vector in the nicotine-bound structure, which has been used as reference (Table 2, Fig. 2d). For further explanation on projection vectors, see Materials and Methods. The angle in the DH $\beta$ E-bound structure is 21.4°, while this number lies within the range of –5°–7.7° for all other Ls-AChBP structures complexed with different agonists. These measurements reveal that the C-loop undergoes a conformational movement, which is perpendicular to the previously observed C-loop movements in AChBP structures and thus could indicate that DH $\beta$ E inhibits nAChRs by a unique mechanism.

To investigate if this C-loop movement could be due to crystal packing effects, we undertook a detailed analysis of the DH $\beta$ E-bound structure. Only C-loops of five subunits (chains B and D of one pentamer and chains G, I, and J of the other pentamer) out of ten subunits of the Ls-AChBP structure in complex with DH $\beta$ E are in contact (closer than 3.5 Å) with symmetry-related molecules. Furthermore, different loop regions (residues 23–28, 67–72 or 160–167) of the symmetry-related molecules are involved in those contacts. Therefore, it is unlikely that the difference in C-loop conformation of the DH $\beta$ E-bound structure compared to other Ls-AChBP structures is determined by crystal packing forces. To investigate C-loop flexibility, we compared the average C-loop B-factor to the average B-factor of all protein atoms. The average B-factor of all ten C-loops in the DH $\beta$ E-bound structure is 47 Å<sup>2</sup> compared to 37 Å<sup>2</sup> for all protein atoms. Thus, the average B-factor is slightly increased at the C-loop relative to the overall average B-factor. However, other Ls-AChBP structures in complex with agonists (PDB IDs: 1uv6, 3u8l, 2zju, 3u8k, 3u8m, 3u8n, and 2zjv) show the same trend as for the DH $\beta$ E-bound structure, except for the complexes with nicotine (PDB ID: 1uw6) and NS3531 (PDB ID: 3u8j). In these latter two structures, the C-loop has lower and equal values, respectively, compared to the overall average B-factor.

A similar hypothesis that DH $\beta$ E inhibits nAChRs by a unique mechanism was previously raised by Bertrand *et al.* Based on electrophysiological data [22] it was shown that an L247T mutation in the  $\alpha$ 7 nAChR ion channel domain renders DH $\beta$ E an agonist [22]. Since mutation of L247T also reduces desensitization, it was suggested that DH $\beta$ E inhibits the activity of nAChRs by stabilizing the desensitized state rather than the non-activated state of the receptor. The unique conformation of the C-loop observed in the DH $\beta$ E-bound structure of Ls-AChBP together with a hydrogen-bonding network similar to that seen for agonists supports a unique mode of antagonism for DH $\beta$ E compared to prototypical antagonists and toxins.

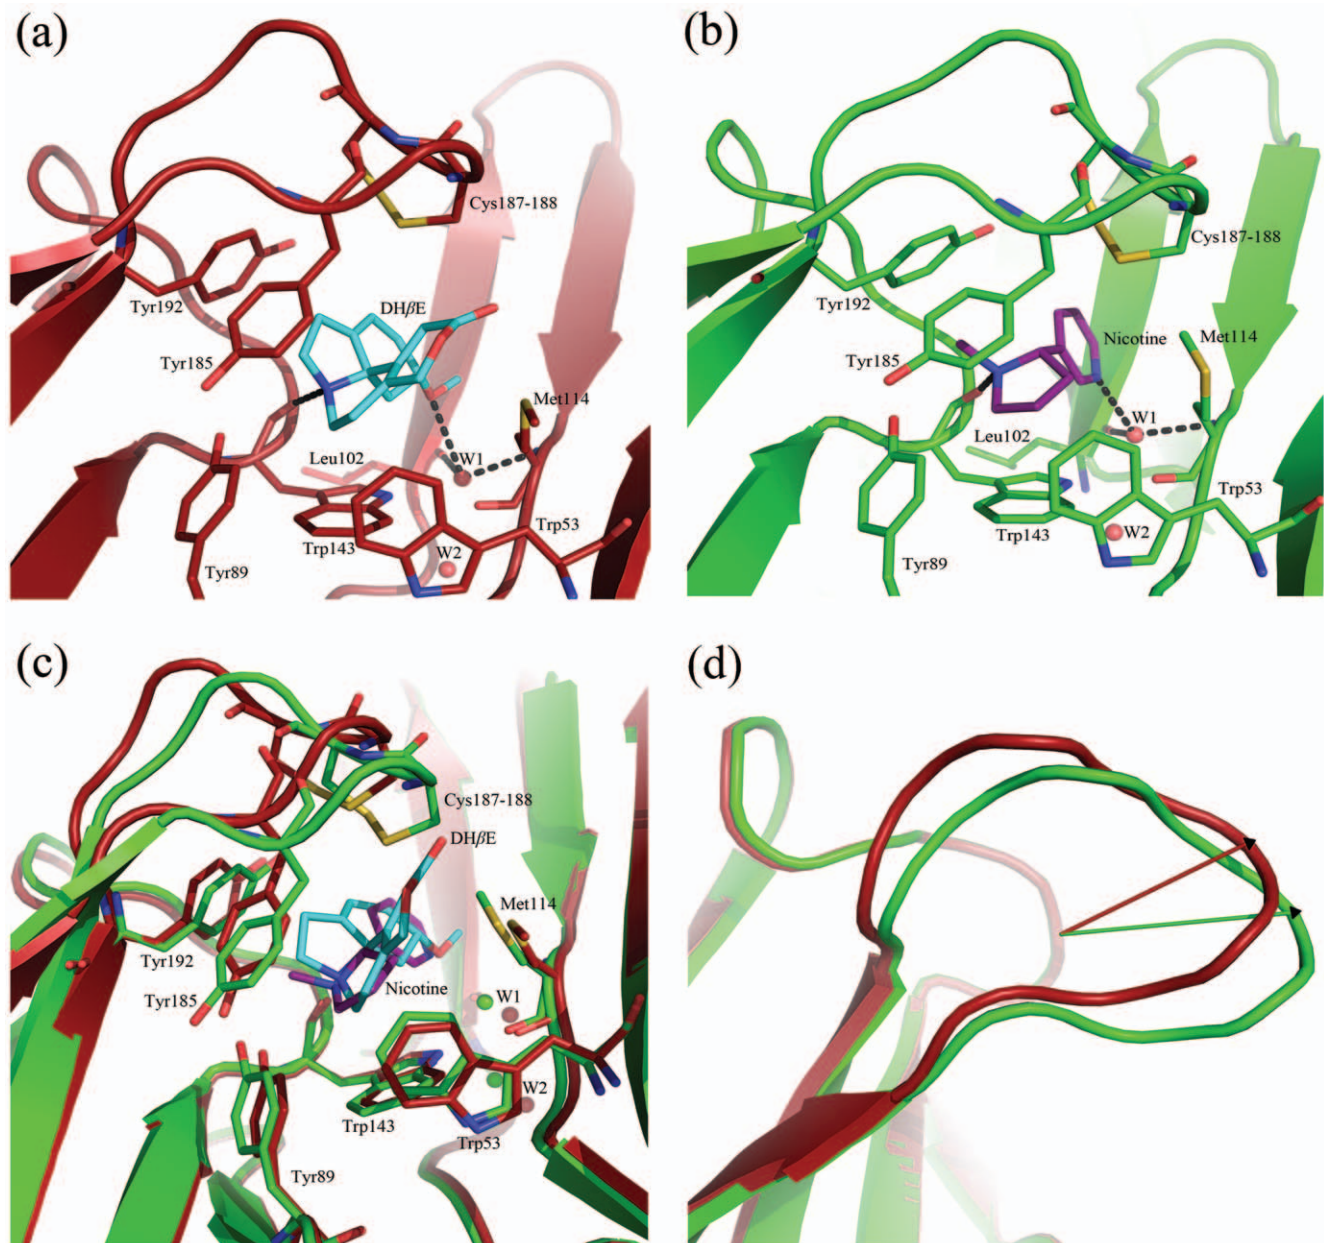

**Figure 2. Comparison of DH $\beta$ E-bound and nicotine-bound structures of *Ls*-AChBP.** (a,b) Comparison of the ligand-binding site of the DH $\beta$ E-bound structure (a, red) with the nicotine-bound structure (b, green). DH $\beta$ E and nicotine are colored in cyan and purple, respectively. Hydrogen bonds between ligand and its surroundings are shown as stippled lines. The location of the residues is identical except for the residues from the C-loop (residues 185–192). Also, the conformation of the Met114 side chain from the complementary side is different between the two structures. (c) Conformational change of the C-loop due to DH $\beta$ E binding to *Ls*-AChBP. The DH $\beta$ E-bound structure (red) has been superimposed onto the nicotine-bound *Ls*-AChBP structure (green). (d) The projection vectors belonging to the nicotine-bound and DH $\beta$ E-bound *Ls*-AChBP structures are shown in green and red, respectively. The angle between the two projection vectors is 21.4°. Angles between projection vectors of *Ls*-AChBP co-crystallized with nAChR agonists are listed in Table 2 for comparison. For further details, see Fig. S3. doi:10.1371/journal.pone.0040757.g002

## Conclusions

In this study, we have determined the crystal structure of *Ls*-AChBP in complex with DH $\beta$ E, which is a potent competitive antagonist of nAChRs. The structure reveals three main features that are unique to this antagonist: (i) DH $\beta$ E introduces a C-loop closure compared to that of agonists, (ii) the C-loop undergoes a conformational shift perpendicular to the previously observed C-loop movements, and (iii) the hydrogen-bonding network of DH $\beta$ E

is similar to that of agonists. Thus, DH $\beta$ E seems to prevent receptor activation *via* a mechanism different from that of prototypical antagonists and toxins.

## Materials and Methods

### Protein purification and crystallization

Recombinant *Ls*-AChBP was expressed using the Bac-to-Bac baculovirus expression system in *Sf9* insect cells and purified as

**Table 2.** Quantification of the C-loop conformational change.

| Ls-AChBP complexed with                                                | Trp143(O) - Cys187(S) distance (Å) <sup>a</sup> | Angle between projection vectors (°) <sup>b</sup> |
|------------------------------------------------------------------------|-------------------------------------------------|---------------------------------------------------|
| Agonist: nicotine <sup>c</sup>                                         | 7.3                                             | -                                                 |
| Agonist: carbamylcholine <sup>d</sup>                                  | 7.3                                             | -5.0                                              |
| Agonist: 1-(5-phenylpyridin-3-yl)-1,4-diazepane <sup>e</sup>           | 7.5                                             | -4.2                                              |
| Agonist: imidacloprid <sup>f</sup>                                     | 10.8                                            | 0.1                                               |
| Agonist: 1-(5-ethoxy-pyridin-3-yl) 1,4- diazepane <sup>g</sup>         | 7.8                                             | 0.1                                               |
| Agonist: 1-(6-bromopyridin-3-yl)-1,4-diazepane <sup>h</sup>            | 7.3                                             | 0.2                                               |
| Agonist: 1-(6-bromo-5-ethoxy-pyridin-3-yl)-1,4- diazepane <sup>i</sup> | 7.5                                             | 2.2                                               |
| Agonist: 1-(pyridin-3-yl)-1,4-diazepane <sup>j</sup>                   | 7.5                                             | 4.7                                               |
| Agonist: clothianidine <sup>k</sup>                                    | 7.3                                             | 7.7                                               |
| Antagonist: DH $\beta$ E <sup>l</sup>                                  | 7.5                                             | 21.4                                              |

<sup>a</sup>Quantification of C-loop closure by the method of Brams *et al.* [21].

<sup>b</sup>For explanation on projection vectors, see Materials and Methods.

PDB ID (chain A):

<sup>c</sup>1uw6;

<sup>d</sup>1uv6;

<sup>e</sup>3u8l (chain B);

<sup>f</sup>2zju;

<sup>g</sup>3u8k;

<sup>h</sup>3u8m;

<sup>i</sup>3u8n;

<sup>j</sup>3u8j;

<sup>k</sup>2zjv;

<sup>l</sup>4alx.

doi:10.1371/journal.pone.0040757.t002

described previously [12,19]. The protein solution was incubated with 50 mM DH $\beta$ E prior to crystallization. DH $\beta$ E-bound crystals were obtained using the hanging drop vapor diffusion method at 20°C. Crystallization drops were made by mixing 1  $\mu$ l of a 4.9 mg/ml protein:DH $\beta$ E solution in 20 mM Tris Base (pH 8.0) and 20 mM NaCl with 1  $\mu$ l of crystallization solution containing 0.1 M HEPES (pH 7.5), 25% v/v polyethylene glycol (PEG) 400, and 0.2 M MgCl<sub>2</sub>. Crystals grew within 3 weeks to a final length of 0.2 mm.

### Crystallographic data collection, refinement, and model building

The crystal was mounted in a cryo-loop and flash-cooled in liquid nitrogen after brief immersion in a cryo-protectant composed of mother liquor supplemented with 25% (v/v) glycerol. X-ray data were collected at 100 K on beamline I911-3 at the MAX-lab synchrotron, Lund, Sweden, using a marmosaic 225 detector at a wavelength of 0.997 Å. Data were processed and scaled using *XDS* [23] and *Scala* [24], respectively. Five percent of the data were set aside during the scaling process as test set for calculation of  $R_{\text{free}}$ .

The structure was solved by the molecular replacement method using the program *Phaser* [25]. A pentamer of Ls-AChBP (in-house structure; to be published) was used as the search model. The refinements were performed with *Phenix* [26] using non-crystallographic symmetry (NCS) and rebuilt interactively using *Coot* [27]. Residues in the F-loop (154–164) were excluded from NCS restraints. The input structure of DH $\beta$ E was generated using *Maestro* [28] and *MacroModel* [29]. Low energy conformations of DH $\beta$ E with a protonated tertiary nitrogen were generated using the Monte Carlo molecular mechanics method with an energy cutoff set to 13 kJ/mol and used to generate geometry restraints after selection of the low energy conformer with the best visual fit to the electron density map. Water molecules were added during

the refinement using *Phenix*. The starting  $R_{\text{work}}$  and  $R_{\text{free}}$  of the structure were 39.1% and 40%, respectively, which were improved to the final  $R_{\text{work}}$  and  $R_{\text{free}}$  of 20.1% and 24.2%, respectively. Data collection and refinement statistics are summarized in Table 1.

The quality of the final model was assessed by examination of the detailed stereochemistry using *Procheck* [30] and *Molprobability* [31]. The Ramachandran plot of the structure shows that 91.7% of the residues are in the most favored regions by the *Procheck* criteria, 8.1% in additionally allowed regions and 0.2% in the generously allowed regions.

### Structure analysis

The structure and ligand analyses were performed using *Coot* [27] and *PyMOL* [32]. The figures were generated using *PyMOL*.

The superposition of the DH $\beta$ E-bound structure onto the nicotine-bound Ls-AChBP structure was performed on C<sup>z</sup> atoms employing the “super” command in *PyMOL*. The projection vector (shown in green, Fig. 2d) belonging to the nicotine-bound structure was defined as follows: (i) First, a reference plane was defined at the C-loop position (residues 185–192) in the nicotine-bound structure (PDB ID: 1uw6, chain A [19]). (ii) The vector defined between the center of the reference plane and the C<sup>z</sup> atom of Cys187 in the nicotine-bound structure was projected onto the reference plane to define the reference projection vector (shown in green, Fig. 2d). The projection vector belonging to the DH $\beta$ E-bound structure (shown in red, Fig. 2d) was defined as follows: (i) The structure of DH $\beta$ E-bound Ls-AChBP (chain A) was superimposed onto the nicotine-bound reference structure, based on residues located in the central  $\beta$ -sheets and C<sup>z</sup> atoms. (ii) The vector defined between the center of the reference plane in the nicotine-bound structure and the C<sup>z</sup> atom of Cys187 in the DH $\beta$ E-bound structure was projected onto the reference plane, defining the projection vector (shown in red, Fig. 2d).

## Accession Numbers

Coordinates and structure factors have been deposited in the Protein Data Bank with accession number 4alx.

## Supporting Information

**Figure S1** The conformation of the C-loop is very similar in all ten subunits. The subunits of the DH $\beta$ E-bound structure have been superimposed (shown in different colors). (TIF)

**Figure S2** An omit 2Fo-Fc map for DH $\beta$ E shown at 1 $\sigma$  with DH $\beta$ E modeled in. Three different views of the electron density are shown. (TIF)

**Figure S3** Vector representation showing the conformational change of the C-loop due to DH $\beta$ E binding to Ls-AChBP. The DH $\beta$ E-bound structure (red) has been superimposed onto the

nicotine-bound Ls-AChBP structure (green). **Ob** is the distance between the center of the C-loop and C $^{\alpha}$  atom of Cys187 in DH $\beta$ E-bound Ls-AChBP structure, and **Oa** is the corresponding projection vector. **Oc** is the distance between the center of the C-loop and C $^{\alpha}$  atom of Cys187 in nicotine-bound Ls-AChBP structure, and **Od** is the corresponding projection vector. (TIF)

## Acknowledgments

We thank MAX-lab (Lund, Sweden) for providing beamtime.

## Author Contributions

Conceived and designed the experiments: AS JSK JLK MG TB. Performed the experiments: AS EØN. Analyzed the data: AS JSK EØN MG TB. Contributed reagents/materials/analysis tools: JLK. Wrote the paper: AS JSK TB.

## References

- Decker MW, Brioni JD, Bannon AW, Arneric SP (1995) Diversity of neuronal nicotinic acetylcholine receptors: lessons from behavior and implications for CNS therapeutics. *Life Sci* 56: 545–570.
- McGehee DS (1999) Molecular diversity of neuronal nicotinic acetylcholine receptors. *Ann N Y Acad Sci* 868: 565–577.
- Hogg RC, Raggenbass M, Bertrand D (2003) Nicotinic acetylcholine receptors: from structure to brain function. *Rev Physiol Biochem Pharmacol* 147: 1–46.
- Changeux JP, Devillers-Thiery A, Chemouilli P (1984) Acetylcholine receptor: an allosteric protein. *Science* 225: 1335–1345.
- Brejic K, van Dijk WJ, Klaassen RV, Schuurmans M, van der Oost J, et al. (2001) Crystal structure of an ACh-binding protein reveals the ligand-binding domain of nicotinic receptors. *Nature* 411: 269–276.
- Bouzat C, Gumilar F, Spitzmaul G, Wang HL, Rayes D, et al. (2004) Coupling of agonist binding to channel gating in an ACh-binding protein linked to an ion channel. *Nature* 430: 896–900.
- Hansen SB, Sulzenbacher G, Huxford T, Marchot P, Taylor P, et al. (2005) Structures of Aplysia AChBP complexes with nicotinic agonists and antagonists reveal distinctive binding interfaces and conformations. *EMBO J* 24: 3635–3646.
- Hibbs RE, Sulzenbacher G, Shi J, Talley TT, Conrod S, et al. (2009) Structural determinants for interaction of partial agonists with acetylcholine binding protein and neuronal alpha7 nicotinic acetylcholine receptor. *EMBO J* 28: 3040–3051.
- Celie PH, Kasheverov IE, Mordvintsev DY, Hogg RC, van Nierop P, et al. (2005) Crystal structure of nicotinic acetylcholine receptor homolog AChBP in complex with an alpha-conotoxin PnIA variant. *Nat Struct Mol Biol* 12: 582–588.
- Bourne Y, Radić Z, Araújo R, Talley TT, Benoit E, et al. (2010) Structural determinants in phycotoxins and AChBP conferring high affinity binding and nicotinic AChR antagonism. *Proc Natl Acad Sci USA* 107: 6076–6081.
- Brams M, Gay EA, Sáez JC, Guskov A, van Elk R, et al. (2011) Crystal structures of a cysteine-modified mutant in Loop D of acetylcholine-binding protein. *J Biol Chem* 286: 4420–4428.
- Rohde LA, Ahring PK, Jensen ML, Nielsen EØ, Peters D, et al. (2011) Inter-subunit bridge formation governs agonist efficacy at nicotinic acetylcholine alpha4beta2 receptors; a unique role of halogen bonding revealed. *J Biol Chem* 287: 4248–4259.
- Decker MW, Anderson DJ, Brioni JD, Donnelly-Roberts DL, Kang CH, et al. (1995) Erysodine, a competitive antagonist at neuronal nicotinic acetylcholine receptors. *Eur J Pharmacol* 280: 79–89.
- Chavez-Noriega LE, Crona JH, Washburn MS, Urrutia A, Elliott KJ, et al. (1997) Pharmacological characterization of recombinant human neuronal nicotinic acetylcholine receptors h $\alpha$ 2 $\beta$ 2, h $\alpha$ 2 $\beta$ 4, h $\alpha$ 3 $\beta$ 2, h $\alpha$ 3 $\beta$ 4, h $\alpha$ 4 $\beta$ 2, h $\alpha$ 4 $\beta$ 4 and h $\alpha$ 7 expressed in *Xenopus* oocytes. *J Pharmacol Exp Ther* 280: 346–356.
- Marks MJ, Whiteaker P, Calcaterra J, Stitzel JA, Bullock AE, et al. (1999) Two pharmacologically distinct components of nicotinic receptor-mediated rubidium efflux in mouse brain require the  $\beta$ 2 subunit. *J Pharmacol Exp Ther* 289: 1090–1103.
- Papke RL, Dwoskin LP, Crooks PA, Zheng G, Zhang Z, et al. (2008) Extending the analysis of nicotinic receptor antagonists with the study of alpha6 nicotinic receptor subunit chimeras. *Neuropharmacology* 54: 1189–1200.
- Iturriaga-Vásquez P, Carbone A, García-Beltrán O, Livingstone PD, Biggin PC, et al. (2010) Molecular determinants for competitive inhibition of alpha4beta2 nicotinic acetylcholine receptors. *Mol Pharmacol* 78: 366–375.
- Harvey SC, Luetje CW (1996) Determinants of competitive antagonist sensitivity on neuronal nicotinic receptor beta subunits. *J Neurosci* 16: 3798–3806.
- Celie PHN, van Rossum-Fikkert SE, van Dijk WJ, Brejic K, Smit AB, et al. (2004) Nicotine and carbamylcholine binding to nicotinic acetylcholine receptors as studied in AChBP crystal structures. *Neuron* 41: 907–914.
- Talley TT, Harel M, Hibbs RE, Radić Z, Tomizawa M, et al. (2008) Atomic interactions of neonicotinoid agonists with AChBP: molecular recognition of the distinctive electronegative pharmacophore. *Proc Natl Acad Sci USA* 105: 7606–7611.
- Brams M, Pandya A, Kuzmin D, van Elk R, Krijnen L, et al. (2011) A structural and mutagenic blueprint for molecular recognition of strychnine and d-tubocurarine by different Cys-loop receptors. *PLoS Biol* 9: 1–12.
- Bertrand D, Devillers-Thiery A, Revah F, Galzi JL, Hussy N, et al. (1992) Unconventional pharmacology of a neuronal nicotinic receptor mutated in the channel domain. *Proc Natl Acad Sci USA* 89: 1261–1265.
- Kabsch W (2010) XDS. *Acta Crystallogr D Biol Crystallogr* 66: 125–132.
- Leslie AGW (1992) Joint CCP4 + ESW-EAMCB Newsletter on Protein Crystallography. 26.
- McCoy AJ, Grosse-Kunstleve RW, Adams PD, Winn MD, Storoni LC, et al. (2007) Phaser crystallographic software. *J Appl Crystallogr* 40: 658–674.
- Adams PD, Afonine PV, Bunkóczi G, Chen VB, Davis IW, et al. (2010) PHENIX: a comprehensive Python-based system for macromolecular structure solution. *Acta Crystallogr D Biol Crystallogr* 66: 213–221.
- Emsley P, Cowtan K (2004) Coot: model-building tools for molecular graphics. *Acta Crystallogr D Biol Crystallogr* 60: 2126–2132.
- Maestro, version 9.2, Schrödinger, LLC, New York, NY, 2011.
- MacroModel, version 9.9, Schrödinger, LLC, New York, NY, 2011.
- Laskowski RA, MacArthur MW, Moss DS, Thornton JM (1993) Procheck - a program to check the stereochemical quality of protein structures. *J Appl Crystallogr* 26: 283–291.
- Chen VB, Arendall WB 3rd, Headd JJ, Keedy DA, Immormino RM, et al. (2010) MolProbity: all-atom structure validation for macromolecular crystallography. *Acta Crystallogr D Biol Crystallogr* 66: 12–21.
- The PyMOL Molecular Graphics System. Version 1.5.0.1, Schrödinger, LLC.
